# Supplementary material for: Use of Protein Content, Amylose Content, and RVA Parameters to Evaluate the Taste Quality of Rice
Source: Front Nutr. 2022 Jan 13;8:758547. doi: 10.3389/fnut.2021.758547 (PMC8793496; doi:10.3389/fnut.2021.758547)
Supplement: Supplementary Table S1 — Taste value of rice of different origins in 2019. [file Table_1.xlsx]

## Sheet: Sheet1
Table S1 The taste value of rice in different origins in 2019
Variety	Variety type	Grain shape	Origin	Taste value
Basmati	Conventional Indica rice	Long grain	Qianjiang City, Hubei Province, China	56
Tianyuanxiangjing	Conventional Japonica rice	Long grain	Xiaogan City, Hubei Province, China	64
Yongyou7850	Indica-Japonica hybrid rice	Short grain	Ningbo City, Zhejiang Province, China	69
Longliangyou534	Hybrid Indica rice	Long grain	Yicheng City, Hubei Province, China	71
Runnong99	Conventional Japonica rice	Short grain	Jining City, Shandong Province, China	71
Wuyun6378	Conventional Japonica rice	Short grain	Wuhan City, Hubei Province, China	74
Yongyou4949	Indica-Japonica hybrid rice	Short grain	Xianning City, Hubei Province, China	74
Tianyouhuazhan	Hybrid Indica rice	Long grain	Huanggang City, Hubei Province, China	75
Yongyou4949	Indica-Japonica hybrid rice	Short grain	Ningbo City, Zhejiang Province, China	75
Huanghuazhan	Conventional Indica rice	Long grain	Xianning City, Hubei Province, China	76
Jinjing818	Conventional Japonica rice	Short grain	Jining City, Shandong Province, China	76
Jinjing1Hao	Conventional Japonica rice	Long grain	Kunming, Yunnan Province, China	77
Ayou442	Hybrid Indica rice	Long grain	Tianmen City, Hubei Province, China	78
Handao277	Conventional Japonica rice	Short grain	Jining City, Shandong Province, China	78
Huanghuazhan	Conventional Indica rice	Long grain	Huanggang City, Hubei Province, China	78
Huanghuazhan	Conventional Indica rice	Long grain	Xiangyang City, Hubei Province, China	78
Jindao919	Conventional Japonica rice	Short grain	Jining City, Shandong Province, China	79
Mabeiyouzhan	Conventional Indica rice	Long grain	Jingzhou City, Hubei Province, China	79
9311	Conventional Indica rice	Long grain	Jingzhou City, Hubei Province, China	80
Koshihikari	Conventional Japonica rice	Short grain	Jingzhou City, Hubei Province, China	80
Liangyou6326	Hybrid Indica rice	Long grain	Huanggang City, Hubei Province, China	80
Mabeiyouzhan	Conventional Indica rice	Long grain	Wuhan City, Hubei Province, China	80
Shengdao18	Conventional Japonica rice	Short grain	Jining City, Shandong Province, China	80
Tianyuanjing036	Conventional Japonica rice	Long grain	Jingzhou City, Hubei Province, China	80
Xiangzhaoxian15	Conventional Indica rice	Long grain	Huanggang City, Hubei Province, China	80
Exiang2Hao	Conventional Japonica rice	Long grain	Qianjiang City, Hubei Province, China	81
Ezhong5Hao	Conventional Indica rice	Long grain	Yichang City, Hubei Province, China	81
Huanghuazhan	Conventional Indica rice	Long grain	Jingzhou City, Hubei Province, China	81
Huanghuazhan	Conventional Indica rice	Long grain	Xianning City, Hubei Province, China	81
Lvyinzhan	Conventional Indica rice	Long grain	Changsha City, Hunan Province, China	81
Runnong4Hao	Conventional Japonica rice	Short grain	Jining City, Shandong Province, China	81
Huanghuazhan	Conventional Indica rice	Long grain	Huanggang City, Hubei Province, China	82
Mabeiyouzhan	Conventional Indica rice	Long grain	Qianjiang City, Hubei Province, China	82
Shenyou513	Hybrid Indica rice	Long grain	Xiangyang City, Hubei Province, China	82
Yexiangyoubasi	Conventional Indica rice	Long grain	Nanchang City, Jiangxi Province, China	82
Chuangyu9Hao	Conventional Indica rice	Long grain	Jingzhou City, Hubei Province, China	83
Guangliangyouxiang66	Hybrid Indica rice	Long grain	Huanggang City, Hubei Province, China	83
Huanghuazhan	Conventional Indica rice	Long grain	Nanchang City, Jiangxi Province, China	83
Longliangyou534	Hybrid Indica rice	Long grain	Xiaogan City, Hubei Province, China	83
Runnong11	Conventional Japonica rice	Short grain	Jining City, Shandong Province, China	83
Taiyou398	Hybrid Indica rice	Long grain	Huanggang City, Hubei Province, China	83
Yuzhenxiang	Conventional Indica rice	Long grain	Jingzhou City, Hubei Province, China	83
Exiang2Hao	Conventional Japonica rice	Long grain	Jingzhou City, Hubei Province, China	84
Huanghuazhan	Conventional Indica rice	Long grain	Qianjiang City, Hubei Province, China	84
Huanghuazhan	Conventional Indica rice	Long grain	Wuhan City, Hubei Province, China	84
Huanghuazhan	Conventional Indica rice	Long grain	Huanggang City, Hubei Province, China	84
MeixiangzhanⅡ	Conventional Indica rice	Long grain	Guangzhou City, Guangdong Province, China	84
Tianyouhuazhan	Hybrid Indica rice	Long grain	Xiangyang City, Hubei Province, China	84
Yunxiangyou1Hao	Hybrid Indica rice	Long grain	Kunming, Yunnan Province, China	84
Yuzhenxiang	Conventional Indica rice	Long grain	Enshi Tujia and Miao AutonomousPrefecture, Hubei Province, China	84
9311	Conventional Indica rice	Long grain	Qianjiang City, Hubei Province, China	85
Ezhong5Hao	Conventional Indica rice	Long grain	Wuhan City, Hubei Province, China	85
Fudao88	Conventional Indica rice	Long grain	Qianjiang City, Hubei Province, China	85
Huanghuazhan	Conventional Indica rice	Long grain	Jingzhou City, Hubei Province, China	85
Huanghuazhan	Conventional Indica rice	Long grain	Xiangyang City, Hubei Province, China	85
Jiafengyou3Hao	Indica-Japonica hybrid rice	Long grain	Jingzhou City, Hubei Province, China	85
Liangyouersansimiao	Hybrid Indica rice	Long grain	Huanggang City, Hubei Province, China	85
Wanxiangyou982	Hybrid Indica rice	Long grain	Suizhou City, Hubei Province, China	85
Yliangyou957	Hybrid Indica rice	Long grain	Huanggang City, Hubei Province, China	85
Yuenongsimiao	Conventional Indica rice	Long grain	Xiangyang City, Hubei Province, China	85
Bliangyouhuazhan	Hybrid Indica rice	Long grain	Xianning City, Hubei Province, China	86
Changliangyousimiao	Hybrid Indica rice	Long grain	Enshi Tujia and Miao Autonomous Prefecture, Hubei Province, China	86
Daohuaxiang2Hao	Conventional Japonica rice	Long grain	Jingzhou City, Hubei Province, China	86
Exiang2Hao	Conventional Japonica rice	Long grain	Xiaogan City, Hubei Province, China	86
Exiang2Hao	Conventional Japonica rice	Long grain	Xiaogan City, Hubei Province, China	86
Guanliangyouhuazhan	Conventional Indica rice	Long grain	Xiaogan City, Hubei Province, China	86
JiafengyouⅡ	Hybrid Indica rice	Long grain	Nanchang City, Jiangxi Province, China	86
Jingliangyou1212	Hybrid Indica rice	Long grain	Tianmen City, Hubei Province, China	86
MeixiangzhanⅡ	Conventional Indica rice	Long grain	Wuhan City, Hubei Province, China	86
Tianyouhuazhan	Hybrid Indica rice	Long grain	Nanchang City, Jiangxi Province, China	86
Xinliangyou2172	Hybrid Indica rice	Long grain	Jingmen City, Hubei Province, China	86
Yexiangyoulisi	Hybrid Indica rice	Long grain	Wuhan City, Hubei Province, China	86
Yuehesimiao	Conventional Indica rice	Long grain	Xianning City, Hubei Province, China	86
Yuzhenxiang	Conventional Indica rice	Long grain	Wuhan City, Hubei Province, China	86
Yuzhenxiang	Conventional Indica rice	Long grain	Yichang City, Hubei Province, China	86
Cliangyouhuazhan	Hybrid Indica rice	Long grain	Xianning City, Hubei Province, China	87
Cliangyouhuazhan	Hybrid Indica rice	Long grain	Suizhou City, Hubei Province, China	87
Dalixiang	Conventional Indica rice	Long grain	Zunyi City, Guizhou Province, China	87
Tianyou8012	Hybrid Indica rice	Long grain	Suizhou City, Hubei Province, China	87
Wuxiangyou398	Hybrid Indica rice	Long grain	Huanggang City, Hubei Province, China	87
Exiang2Hao	Conventional Japonica rice	Long grain	Wuhan City, Hubei Province, China	88
Guangliangyouxiang66	Hybrid Indica rice	Long grain	Xiaogan City, Hubei Province, China	88
Huanghuazhan	Conventional Indica rice	Long grain	Huanggang City, Hubei Province, China	88
Liangyou688	Hybrid Indica rice	Long grain	Xiangyang City, Hubei Province, China	88
Quan9You801	Hybrid Indica rice	Long grain	Xianning City, Hubei Province, China	88
Tianyouhuazhan	Hybrid Indica rice	Long grain	Xiangyang City, Hubei Province, China	88
Tianyuanxiangjing	Conventional Japonica rice	Long grain	Enshi Tujia and Miao Autonomous Prefecture, Hubei Province, China	88
Yangxizao	Conventional Indica rice	Long grain	Suizhou City, Hubei Province, China	88
Yiliangyou8Hao	Hybrid Indica rice	Long grain	Huanggang City, Hubei Province, China	88
Fengliangyou1Hao	Hybrid Indica rice	Long grain	Xianning City, Hubei Province, China	89
Jingzhan1Hao	Conventional Indica rice	Long grain	Huanggang City, Hubei Province, China	89
Jiuyouehesimiao	Conventional Indica rice	Long grain	Xiangyang City, Hubei Province, China	89
MeixiangzhanⅡ	Conventional Indica rice	Long grain	Nanchang City, Jiangxi Province, China	89
Yangxizao	Conventional Indica rice	Long grain	Jingmen City, Hubei Province, China	89
Ezhong5Hao	Conventional Indica rice	Long grain	Jingmen City, Hubei Province, China	91
