# Supplementary material for: Use of Protein Content, Amylose Content, and RVA Parameters to Evaluate the Taste Quality of Rice
Source: Front Nutr. 2022 Jan 13;8:758547. doi: 10.3389/fnut.2021.758547 (PMC8793496; doi:10.3389/fnut.2021.758547)
Supplement: Supplementary Table S2 — Protein content, amylose content, RVA characteristics, and taste value of rice of different taste quality types. [file Table_2.xlsx]

## Sheet: Sheet1
Table S2 Protein content, amylose content, RVA characteristics and taste value of rice of different taste quality types
HTV
Nitrogen Fertilizer-Variety	Peak viscosity（RVU）	Hold viscosity（RVU）	Breakdown（RVU）	Final viscosity（RVU）	Setback（RVU）	Peak time（min）	Pasting temperature（℃）	Protein content(%)	Amylose content（%）	Hardness（kgf）	Stickiness（kgf）	Taste value
50N-MeixiangzhanⅡ	334.278	211.444	122.833	376.194	41.9167	5.74443	74.7667	5.7715	20.8258	1.44	0.153333	86
50N-Lvyinzhan	354.944	236.528	118.417	399.75	44.8056	5.73333	85.15	6.58467	19.1032	1.28333	0.193333	86
50N-Huanghuazhan	373.75	228.167	145.583	388.25	14.5	5.66667	74.0667	7.5565	22.9569	1.48333	0.176667	86
25N-MeixiangzhanⅡ	363.972	229.194	134.778	389.611	25.6389	5.75553	80.9667	7.10033	19.7976	1.12333	0.183333	85
100N-Lvyinzhan	356.194	242.75	113.444	410.778	54.5833	5.7222	82.9667	6.82267	20.9297	1.25	0.23	85
25N-Huanghuazhan	414	251.194	162.806	412.028	-1.97222	5.66667	74.0667	7.21933	20.6926	1.56333	0.196667	85
50N-JiafengyouⅡ	285.389	148.917	136.472	255.611	-29.7778	5.92223	75.5933	7.23917	19.9412	2.77333	0.183333	85
175N-Lvyinzhan	339.722	214.139	125.583	391.972	52.25	5.7	81.3833	7.06067	20.1437	1.31667	0.216667	83
100N-JiafengyouⅡ	258.444	131.167	127.278	230.889	-27.5556	5.87777	75.9833	8.36967	20.163	2.83333	0.18	84
0N-Yongyou4949	350.167	199.083	151.083	325.194	-24.9722	5.6	73.0667	5.355	18.9001	3.77	0.636667	87
25N-Lvyinzhan	358.278	247.056	111.222	422.306	64.0278	5.87777	87.0733	7.63583	18.2986	1.53333	0.18	83
0N-MeixiangzhanⅡ	388.778	245.667	143.111	412.806	24.0278	5.6778	79.0833	5.21617	21.4309	1.13667	0.213333	89
0N-Lvyinzhan	392.333	249.417	142.917	431.833	39.5	5.77777	85.75	5.37483	18.4401	1.25333	0.18	89
0N-Huanghuazhan	418.667	237.778	180.889	397.306	-21.3611	5.6111	74.8167	5.96983	23.6057	1.37667	0.186667	88
0N-JiafengyouⅡ	305.778	158.333	147.444	270.083	-35.6944	5.94447	75.1667	5.831	19.4014	2.31333	0.156667	88
MTV1
0N-Yongyou7850	359.861	245.361	114.5	409.778	49.9167	5.82223	83.25	4.95833	20.2839	3.57	0.513333	81
100N-MeixiangzhanⅡ	342	221.778	120.222	384.528	42.5278	5.77777	80.2167	7.35817	20.0935	1.65667	0.106667	81
75N-Lvyinzhan	415	255.361	159.639	414.306	-0.694444	5.7222	82.9667	7.7945	19.3336	1.31333	0.243333	81
100N-Huanghuazhan	333.972	226.861	107.111	384.75	50.7778	5.72223	80.6333	8.52833	21.9201	1.53333	0.183333	81
175N-Huanghuazhan	365.833	237.889	127.944	399.583	33.75	5.72223	80.6333	8.05233	19.0671	1.50667	0.153333	82
25N-JiafengyouⅡ	273.667	149.361	124.306	254.694	-18.9722	6	77.15	9.5795	17.5671	2.19	0.173333	81
25N-Yongyou4949	373.889	197.694	176.194	319.472	-54.4167	5.94443	73.1267	6.46567	17.744	3.99333	0.63	80
50N-Yongyou4949	347.694	183.278	164.417	303.861	-43.8333	5.9222	72.0667	6.426	18.7906	3.86333	0.686667	79
150N-MeixiangzhanⅡ	340.528	219.889	120.639	402.667	62.1389	5.74447	79.1333	8.07217	21.554	1.75667	0.113333	79
175N-MeixiangzhanⅡ	357.944	220.75	137.194	409.222	51.2778	5.74443	76.2833	7.15983	21.1134	1.61333	0.113333	80
300N-Lvyinzhan	319.472	217.556	101.917	377.639	58.1667	5.64447	84.6	8.70683	19.4699	1.39333	0.216667	79
125N-MeixiangzhanⅡ	327.556	214.25	113.306	394.639	67.0833	5.62223	81.4167	8.07217	21.72	1.52667	0.13	78
125N-Huanghuazhan	344.528	226.917	117.611	383.556	39.0278	5.62223	81.4167	9.83733	19.333	1.80667	0.163333	78
150N-Huanghuazhan	327.611	217.194	110.417	382.639	55.0278	5.7711	81.7933	9.02417	20.3872	1.68333	0.156667	79
75N-JiafengyouⅡ	269.028	143.889	125.139	242.917	-26.1111	5.84443	82.3667	8.60767	20.2623	1.51667	0.17	79
150N-Lvyinzhan	321.583	197.167	124.417	367.361	45.7778	5.62223	83.5833	7.71517	20.1205	1.34333	0.16	78
MTV2
75N-MeixiangzhanⅡ	371.222	206.722	164.5	372.972	1.75	5.6	76.7667	9.83733	19.499	3.94667	0.473333	75
350N-Lvyinzhan	366.75	240	126.75	395.556	28.8056	5.87777	82.25	9.79767	18.6515	4.27667	0.35	75
125N-JiafengyouⅡ	242.861	129.361	113.5	220.139	-22.7222	5.9222	75.9333	8.07217	19.6657	4.19	0.463333	75
250N-JiafengyouⅡ	253.889	136.444	117.444	236.361	-17.5278	5.94447	76.3833	8.925	20.4268	4.29667	0.366667	75
125N-Lvyinzhan	327.472	228.278	99.1944	381.389	53.9167	5.74443	83.85	8.84567	19.9806	4.01333	0.43	76
200N-Huanghuazhan	353.361	231.139	122.222	387.111	33.75	5.85667	81.1333	10.591	16.7816	4.43333	0.363333	76
175N-JiafengyouⅡ	263.639	138.861	124.778	239.194	-24.4444	5.97777	76.7267	8.46883	20.0772	3.89	0.403333	76
200N-JiafengyouⅡ	266.528	135.306	131.222	231.333	-35.1944	5.92223	75.68	8.092	19.6036	3.78667	0.423333	76
300N-JiafengyouⅡ	273.583	152.833	120.75	256.861	-16.7222	6.1	76.05	8.66717	20.0816	3.51	0.476667	76
200N-Lvyinzhan	295.722	201.083	94.6389	348.528	52.8056	5.66667	84.6833	9.38117	20.0083	4.55667	0.54	73
50N-Yongyou7850	364.556	239.889	124.667	396.389	31.8333	5.74447	82.6333	6.76317	18.5549	3.78	0.503333	74
75N-Yongyou7850	365.472	229.389	136.083	377.056	11.5833	5.82223	82.9	7.15983	17.5687	3.94	0.526667	74
75N-Yongyou4949	328.194	171.778	156.417	288.694	-39.5	5.86667	72.7433	7.75483	17.0919	3.53333	0.58	74
100N-Yongyou4949	367.861	206.083	161.778	337.222	-30.6389	6	80.75	7.57633	19.0459	4.05	0.513333	74
300N-MeixiangzhanⅡ	305.944	195.25	110.694	369.583	63.6389	5.72223	77.1	10.0158	19.2667	4.56333	0.526667	74
250N-Lvyinzhan	294.194	199.611	94.5833	359.361	65.1667	5.84443	86.3	10.234	19.0753	4.12667	0.46	74
75N-Huanghuazhan	375.056	230.944	144.111	377.75	2.69444	5.74443	76.6667	10.0158	19.0595	6.87667	0.556667	74
250N-Huanghuazhan	331.889	219.167	112.722	380.806	48.9167	5.8	82.95	11.6818	18.3436	7.03333	0.563333	74
300N-Huanghuazhan	305.028	205.556	99.4722	355.778	50.75	5.83333	84.7167	11.8603	18.9077	7.24667	0.503333	74
150N-JiafengyouⅡ	248.222	129.056	119.167	221.028	-27.1944	5.75553	75.9	8.34983	20.2688	4.90333	0.54	74
150N-Yongyou7850	338.417	230.611	107.806	384.722	46.3056	5.84447	82.95	7.378	18.0328	1.38	0.11	70
300N-Yongyou7850	339.194	223.889	115.306	383	43.8056	5.74447	83	8.25067	19.4293	1.99333	0.123333	70
0N-Tianyuanxiangjing	305.417	204.278	101.139	322.222	16.8056	6.34443	85.5167	8.40933	17.0375	1.69	0.103333	70
175N-Yongyou7850	361.25	230.25	131	393.917	32.6667	5.9	82.6667	6.92183	18.3923	1.76	0.14	69
125N-Yongyou4949	336.25	181.583	154.667	304.583	-31.6667	6.13667	73.85	8.5085	15.992	1.98333	0.113333	70
250N-Tianyuanxiangjing	262.889	171.611	91.2778	284.694	21.8056	6.32223	85.45	9.9365	15.4126	1.45	0.18	69
350N-Tianyuanxiangjing	275.556	187.639	87.9167	300.25	24.6944	6.4	85.4667	9.53983	16.2643	2.02	0.186667	69
125N-Yongyou7850	333.028	238.222	94.8056	406.056	73.0278	5.87777	84.9667	8.23083	18.3949	1.61	0.153333	68
75N-Tianyuanxiangjing	289.167	198.083	91.0833	317.444	28.2778	6.43333	85.7333	9.65883	18.3436	1.4	0.213333	68
25N-Yongyou7850	346.583	237.944	108.639	402.528	55.9444	5.82223	85.5	8.0325	18.8119	1.63667	0.166667	71
200N-Yongyou4949	287.028	152.389	134.639	251.111	-35.9167	5.94443	72.1667	9.401	17.7255	1.65333	0.22	68
150N-Yongyou4949	319.833	167.222	152.611	285.417	-34.4167	5.84447	82.32	7.81433	17.8421	1.74667	0.186667	71
200N-MeixiangzhanⅡ	327.444	204.028	123.417	377.306	49.8611	5.65557	79.4833	10.4323	20.1324	1.68667	0.193333	71
250N-MeixiangzhanⅡ	320.889	201.944	118.944	381.417	60.5278	5.65557	79.3667	9.9365	19.6188	2.17667	0.18	71
350N-MeixiangzhanⅡ	314.667	191.806	122.861	357.806	43.1389	5.57777	79.1333	10.9282	19.028	2.14	0.193333	71
350N-Huanghuazhan	329.417	211.972	117.444	362.972	33.5556	5.64443	82.2667	11.3248	17.7875	2.74667	0.113333	71
100N-Yongyou7850	343.75	235.889	107.861	395.528	51.7778	5.8222	84.0833	7.21933	14.4827	2.51	0.15	72
175N-Yongyou4949	344.639	196.056	148.583	319.722	-24.9167	6.12223	73.6133	7.59617	17.2826	1.76	0.196667	72
350N-JiafengyouⅡ	244.472	130.111	114.361	220.861	-23.6111	5.95553	77.15	9.36133	19.953	1.66333	0.176667	72
25N-Tianyuanxiangjing	278.972	193.361	85.6111	301.806	22.8333	6.4778	85.0167	8.11183	17.9374	2.08	0.253333	72
300N-Tianyuanxiangjing	254.583	160.889	93.6944	273.472	18.8889	6.22223	84.9333	9.89683	16.5831	1.64	0.156667	72
LTV
200N-Yongyou7850	322.444	218.639	103.806	372.472	50.0278	5.74443	83.4333	8.34983	18.2908	4.11333	0.383333	67
350N-Yongyou7850	305.306	202.556	102.75	348.056	42.75	5.7111	84.1667	9.282	19.5371	4.29	0.3	66
250N-Yongyou4949	317.75	169.389	148.361	282.333	-35.4167	5.76667	81.4667	9.95633	16.8348	4.11	0.456667	63
300N-Yongyou4949	348.833	175.444	173.389	302.639	-46.1944	5.75557	76.1	7.854	17.0201	4.12667	0.466667	67
350N-Yongyou4949	290.5	155.556	134.944	258.556	-31.9444	5.77777	80.16	9.67867	15.6636	3.87667	0.496667	66
50N-Tianyuanxiangjing	268.833	175.25	93.5833	291.472	22.6389	6.3	86.1833	9.639	17.5551	4.7	0.37	66
100N-Tianyuanxiangjing	267.278	183.889	83.3889	302.778	35.5	6.43333	87.0667	9.61917	17.0324	4.52333	0.446667	64
175N-Tianyuanxiangjing	269.806	176.556	93.25	297.028	27.2222	6.2778	85.75	9.38117	17.3199	4.20667	0.47	66
250N-Yongyou7850	324.667	222.111	102.556	378.75	54.0833	5.84443	83.8833	8.94483	19.1128	4.12667	0.333333	65
125N-Tianyuanxiangjing	252.556	164.111	88.4444	274.056	21.5	6.3	85.4333	9.59933	16.74	7.04	0.456667	65
150N-Tianyuanxiangjing	259.139	172.417	86.7222	288.111	28.9722	6.3	87.05	9.758	17.1558	4.68667	0.446667	65
200N-Tianyuanxiangjing	247.278	156	91.2778	267.25	19.9722	6.25557	85.7833	10.0753	16.3838	7.37333	0.393333	65
