# Supplementary material for: Use of Protein Content, Amylose Content, and RVA Parameters to Evaluate the Taste Quality of Rice
Source: Front Nutr. 2022 Jan 13;8:758547. doi: 10.3389/fnut.2021.758547 (PMC8793496; doi:10.3389/fnut.2021.758547)
Supplement: Supplementary Table S3 — Descriptive statistics of different taste types of rice. Denotes significant difference at 01. [file Table_3.xlsx]

## Sheet: Sheet1
Table S3 Descriptive statistics of different taste types of rice
	HTV					MTV1					MTV2					LTV					Nitrogen fertilizer	Variety
	Min	Max	Mean	SD	CV	Min	Max	Mean	SD	CV	Min	Max	Mean	SD	CV	Min	Max	Mean	SD	CV
Peak viscosity	258.44	418.67	352.979	44.5057	0.126086	269.03	415	338.76	35.363	0.10439	242.86	375.06	313.534	39.7608	0.126815	247.28	348.83	289.533	33.3964	0.115346		**
Hold viscosity	131.17	251.19	215.389	39.1521	0.181774	143.89	255.36	210.95	30.7666	0.145848	129.06	240	194.549	35.0183	0.179997	155.56	222.11	180.994	22.217	0.12275		**
Breakdown	111.22	180.89	137.59	18.9667	0.137849	101.92	176.19	127.811	21.3145	0.166765	85.61	164.5	118.984	21.1446	0.17771	83.39	173.39	108.539	28.3612	0.261299		**
Final viscosity	230.89	431.83	367.641	64.9374	0.176633	242.92	414.31	364.476	54.3792	0.149198	220.14	406.06	330.731	60.1541	0.181883	258.56	378.75	305.293	39.8174	0.130424		**
Setback	-35.69	64.03	14.662	35.2123	2.4016	-54.42	67.08	25.7169	40.3182	1.56777	-39.5	73.03	17.1973	35.0908	2.04048	-46.19	54.08	15.7592	34.2415	2.1728		**
Peak time	5.6	5.94	5.752	0.10805	0.0187848	5.62	6	5.7631	0.11683	0.0202721	5.58	6.48	5.9137	0.23091	0.0390466	5.71	6.43	6.0392	0.28899	0.0478524		**
Pasting temperature	73.07	87.07	78.6607	4.83036	0.0614075	72.07	84.6	80.04	3.64993	0.0456013	72.17	86.3	80.6524	4.22834	0.0524267	76.1	87.07	83.8725	3.24016	0.038632		**
Protein content	5.22	8.37	6.6073	0.96634	0.146253	4.96	9.84	7.8981	1.24394	0.157499	6.76	11.86	8.9998	1.31536	0.146154	7.85	10.08	9.345	0.6623	0.0708721	**	**
Amylose content	18.3	23.61	20.3087	1.51732	0.0747128	17.57	21.92	19.9213	1.29154	0.0648321	14.48	20.43	18.4495	1.42369	0.0771669	15.66	19.54	17.3867	1.10754	0.0637004		**
Hardness	1.12	3.77	1.762	0.78667	0.446464	1.31	3.99	2.0162	0.91566	0.454151	1.38	7.25	3.1632	1.59509	0.504265	3.88	7.37	4.765	1.16825	0.245173		**
Stickiness	0.15	0.64	0.218	0.11857	0.543899	0.11	0.69	0.2438	0.18818	0.771862	0.1	0.58	0.3183	0.16705	0.524819	0.3	0.5	0.4192	0.06317	0.150692		**
Taste value	83	89	85.93	1.94	0.0225765	78	82	79.7469	1.29	0.0161762	68	76	72.44	2.48	0.0342352	63	67	65.42	1.16	0.0177316	**	**
* * denote significant differences at the 0.01.
