# Supplementary material for: Use of Protein Content, Amylose Content, and RVA Parameters to Evaluate the Taste Quality of Rice
Source: Front Nutr. 2022 Jan 13;8:758547. doi: 10.3389/fnut.2021.758547 (PMC8793496; doi:10.3389/fnut.2021.758547)
Supplement: Supplementary Table S4 — Multiple regression analysis of protein content, amylose content, and RVA on rice taste value. [file Table_4.xlsx]

## Sheet: Sheet1
Table S4 Multiple regression analysis of protein content, amylose content and RVA on rice taste value
	Model		Independent	Adjusted	Unstandardized coefficients		standardized coefficients		t	Significance
			variable	R2	B	Standard error
HTV	1		(Constant)	0.668	96.993	2.067			46.927	0
			Protein		-1.674	0.31	-0.832		-5.404	0
MTV2	1		(Constant)	0.596	68.76	0.535			128.487	0
			Stickiness		11.558	1.493	0.778		7.773	0
LTV	1		(Constant)	0.429	76.814	3.751			20.478	0
			Protein		-1.22	0.4	-0.694		-3.045	0.012
